## Integrated PET and confocal imaging informs a functional timeline for the dynamic process of vascular reconnection during grafting.

Margaret H. Frank<sup>1,2,\*</sup>, Sergey Komarov<sup>3</sup>, Qiang Wang<sup>3</sup>, Ke Li<sup>3</sup>, Matthew Hecking<sup>2</sup>, Halley Fowler<sup>1,4</sup>, Claire Ravenburg<sup>2</sup>, Audrey Widmier<sup>2</sup>, Arielle Johnson<sup>2</sup>, Hannah Thomas<sup>2</sup>, Viktoriya Coneva<sup>1</sup>, Daniel H. Chitwood<sup>5,6</sup>, Yuan-Chuan Tai<sup>3</sup>

<sup>1</sup> Donald Danforth Plant Science Center, 975 North Warson Road, St. Louis, MO, USA

<sup>2</sup> School of Integrative Plant Science, Cornell University, Ithaca, NY, USA

<sup>3</sup> Washington University in St. Louis School of Medicine, Department of Radiology, St. Louis, MO 63130

<sup>4</sup> Emory University School of Medicine, Atlanta, GA 30322

<sup>5</sup> Michigan State University, Department of Computational Mathematics, Science and Engineering, East Lansing, MI, USA

<sup>6</sup> Michigan State University, Department of Horticulture, East Lansing, MI, USA

\*Margaret H. Frank

**Email:** [mhf47@cornell.edu](mailto:mhf47@cornell.edu)

**Author Contributions:** MHF designed and carried out the experiments and led the manuscript preparation, SK assisted with experimental design and carried out the PET imaging experiments and subsequent data analysis, QW and KL assisted with the PET imaging experiments, MH, HF, CR, AW, AJ, HT, and VC carried out the confocal imaging and CFDA transport experiments, DHC assisted with experimental design, and Y-CT led the PET imaging experiments and assisted with manuscript preparation.

**Competing Interest Statement:** None.

**Classification:** Plant Biology

**Keywords:** PET imaging, plant grafting, physiological transport, vascular regeneration.

**This PDF file includes:**

Main Text 3,424 words  
Figures 1 to 4

## 1 **Abstract**

2 Grafting is a widely used agricultural technique that involves the physical joining of separate plant  
3 parts so they form a unified vascular system, enabling beneficial traits from independent  
4 genotypes to be captured in a single plant. This simple, yet powerful tool has been used for  
5 thousands of years to improve abiotic and biotic stress tolerance, enhance yield, and alter plant  
6 architecture in diverse crop systems. Despite the global importance and ancient history of  
7 grafting, our understanding of the fundamental biological processes that make this technique  
8 successful remains limited, making it difficult to efficiently expand on new genotypic graft  
9 combinations. One of the key determinants of successful grafting is the formation of the graft  
10 junction, an anatomically unique region where xylem and phloem strands connect between newly  
11 joined plant parts to form a unified vascular system. Here, we use an integrated imaging  
12 approach to establish a spatiotemporal framework for graft junction formation in the model crop  
13 *Solanum lycopersicum* (tomato), a plant that is commonly grafted worldwide to boost yield and  
14 improve abiotic and biotic stress resistance. By combining Positron Emission Tomography (PET),  
15 a technique that enables the spatio-temporal tracking of radiolabeled molecules, with high-  
16 resolution laser scanning confocal microscopy (LSCM), we are able to merge detailed,  
17 anatomical differentiation of the graft junction with a quantitative timeline for when xylem and  
18 phloem connections are functionally re-established. In this timeline, we identify a 72-hour window  
19 when anatomically connected xylem and phloem strands regain functional capacity, with phloem  
20 restoration typically preceding xylem restoration by about 24-hours. Furthermore, we identify  
21 heterogeneity in this developmental and physiological timeline that corresponds with  
22 microvariability in the physical contact between newly joined rootstock-scion tissues. Our  
23 integration of PET and confocal imaging technologies provides a spatio-temporal timeline that will  
24 enable future investigations into cellular and tissue patterning events that underlie successful  
25 versus failed vascular restoration across the graft junction.

26

## 27 **Introduction**

28

29 Vascular plants have an innate capacity to regenerate in response to wounding, enabling them to  
30 be cut and grafted onto other individuals (1). This property was first recognized by ancient  
31 farmers thousands of years ago (2, 3), and has since become an essential technology that  
32 growers use to combine desirable traits between genotypically distinct root and shoot systems.  
33 This simple yet effective strategy is widely applied to vegetable and perennial crops to combat  
34 biotic and abiotic threats that would otherwise have devastating effects on crop production (4–6).  
35 Despite the tremendous advantages that grafting provides for crop protection and enhanced crop  
36 yield, successful graft combinations are often identified on an inefficient, case-by-case basis (7,  
37 8). This is largely due to a present lack of understanding regarding the fundamental biological  
38 mechanisms that underlie successful graft pairings. In this study, we focus on a central  
39 determinant of a successful graft: the re-establishment of vascular function across the graft  
40 junction.

41 The graft junction is a unique anatomical region that unites newly joined root and shoot systems  
42 into a single vascular conduit. The temporal dynamics of graft junction formation varies widely  
43 among species. Studies from *Arabidopsis* indicate that phloem and xylem strands restore  
44 functional transport within 3-4 and 6-7 days post-grafting, respectively, under room temperature  
45 conditions (9), and that elevated temperatures accelerate this process by approximately 24 hours  
46 (10). Woody perennials, on the other hand, require anywhere from weeks to months to form  
47 stable junctions (11, 12). Regardless of whether the graft is formed between relatively fast-  
48 grafting, herbaceous species or slower woody perennials, there is a shared sequence of cellular  
49 events that ultimately leads to successful junction formation (13). Graft healing is initiated by  
50 cellular adhesion at the rootstock-scion interface, where a necrotic layer is formed from the  
51 wounded cells along the cut site. Following adhesion, necrotic clearing and proliferation of new  
52 callus parenchyma at the root-shoot interface fills in air spaces within the junction. Subsequent

53 specification of callus into new vascular tissue leads to the formation of *de novo* xylem and  
54 phloem connections that bridge the rootstock and scion together (12). The graft junction is  
55 considered complete once these newly formed xylem and phloem strands mature into functional  
56 conducting tissue.

57 While substantial progress has been made towards identifying the molecular genetic processes  
58 that underlie the initial steps of graft adhesion and callus production (9, 15–17), relatively little is  
59 known about how vascular reconnection is coordinated within the developing junction. Basic  
60 questions such as how differentiation corresponds with functional re-establishment of  
61 physiological transport across the junction remain largely unexamined. These fundamental gaps  
62 in our understanding of how grafts are formed can in part be attributed to a lack of *in vivo* tools  
63 that allow for simultaneous quantitative measurements of xylem and phloem conductance.  
64 Currently, there are two methods that are used to investigate restored physiological transport  
65 during grafting. A common method for sensitive tracking of physiological transport involves the  
66 use of xylem- and phloem-mobile dyes and proteins (9, 18–20). Another, direct physiological  
67 measure looks at hydraulic conductance as a metric for restored xylem transport (21). Both of  
68 these methods are informative for tracking graft formation; however, they are also fundamentally  
69 limited. Dye transport assays typically require destructive harvesting, and thus are often not  
70 appropriate for tracking dynamic processes during graft formation. Moreover, it is challenging to  
71 simultaneously track xylem- and phloem-mobile dyes within the same individual, since loading the  
72 dye typically involves wounding, and there are a limited number of suitable dyes with non-  
73 overlapping emission spectra. Hydraulic conductance, on the other hand, can be performed on  
74 the same intact plant over multiple days, but it only provides a coarse measurement for xylem  
75 restoration, and cannot be used to track restored phloem function.

76 Positron emission tomography (PET) is a quantitative imaging technique that enables highly  
77 sensitive, non-invasive *in vivo* measurements of physiological processes (22–24). PET relies on  
78 the production of biomolecules that carry radioactive tags – typically radio-isotopes that decay  
79 through positron emission. These radioactive molecules, referred to as radiotracers, can be  
80 incorporated into living organisms to track metabolic and/or physiological processes in real time.  
81 As the radiotracers decay, they release positrons that react with nearby electrons, creating  
82 annihilation events that produce two gamma photons that are released near 180 degrees from  
83 one another. PET scanners contain multiple rings of detectors that can detect simultaneous  
84 photon release, allowing researchers to computationally reconstruct the position of radiotracers  
85 within living organisms in 3D over a course of minutes to days (depending on the type of  
86 radiotracers employed) (22, 23).

87

88 In this study, we develop a new method for tracking dynamic anatomical and physiological  
89 vascular restoration during graft formation. By integrating PET imaging with laser scanning  
90 confocal microscopy (LSCM), we are able to construct a high-resolution anatomical and  
91 physiological map for restored vascular function. The synthesis of these two datasets reveals a  
92 72-hour window in which xylem and phloem strands differentiate and restore long-distance  
93 transport. Through this work, we also identify sources of micro-variability that alter the temporal  
94 progression of graft formation and should be considered as a potential factor impacting the  
95 molecular characterization of junction formation.

96

## 97 **Results and Discussion**

98

### 99 *PET imaging enables dynamic tracking of xylem and phloem function*

100 Restored physiological function following grafting has yet to be measured using non-destructive,  
101 *in vivo* approaches that allow xylem and phloem conduits to be tracked in the same individual. To

102 address this technological gap, we  
103 tested radionuclides that could be  
104 delivered in a non-destructive  
105 manner, exhibit dynamic transport as  
106 xylem and phloem conduits, and have  
107 sufficiently short half-lives to allow for  
108 same-day dual labeling. To test  
109 whether we could directly track  
110 radiolabeled phloem conduits we  
111 delivered gaseous  $^{11}\text{C}$  to ungrafted  
112 tomato seedlings using a chamber and  
113 an airtight seal around the base of the  
114 hypocotyl (Supplemental Figure S1).  
115 The labeled seedlings fixed the  $^{11}\text{C}$   
116 radioisotope within 14 minutes post-  
117 labeling (Figure 1). Within 19 minutes  
118 post-labeling, the labeled  
119 photosynthates moved into the upper  
120 root system, and by 133-162 minutes  
121 post-labeling,  $^{11}\text{C}$  accumulated in the  
122 growing root tips of the seedling  
123 (Figure 1). To track dynamic xylem  
124 transport, we initially tested whether  
125 radiolabeled  $\text{H}_2^{15}\text{O}$  could be delivered  
126 to root systems and traced through the  
127 xylem; however, the short half-life for  
128  $^{15}\text{O}$  (approximately 122 seconds) and  
129 high energy positrons emitted by this  
130 radioisotope produced a short-lived,  
131 signal with high levels of noisy  
132 background caused by positron  
133 escape (Supplemental Figure S2). We  
134 tested an alternative radiolabel,  
135  $^{13}\text{N}$ , which has a half-life of  
136 approximately 10 minutes. By  
137 feeding plants water with labeled  
138 ammonium ( $[\text{NH}_4^+]$ , referred to as  
139  $^{13}\text{N}$  from here on out) we were able  
140 to directly deliver  $^{13}\text{N}$  to root  
141 systems; this produced an  
142 informative signal that moved from  
143 the labeled roots into the  
144 cotyledons within 17-minutes post-  
145 labeling (Figure 1B).

146 Next, we used our PET labeling  
147 protocol to capture a quantitative  
148 timeline for the physiological  
149 restoration of xylem and phloem  
150 transport during graft healing. We  
151 performed several staggered grafting experiments that enabled us to simultaneously measure  
152 vascular transport across a range of developmental time points from 1-7 days post-grafting  
153 (Figure 2; Supplemental Figure S3). By including an ungrafted control in every imaging round, we  
154 were able to differentiate between technical failures while delivering the radionuclides and

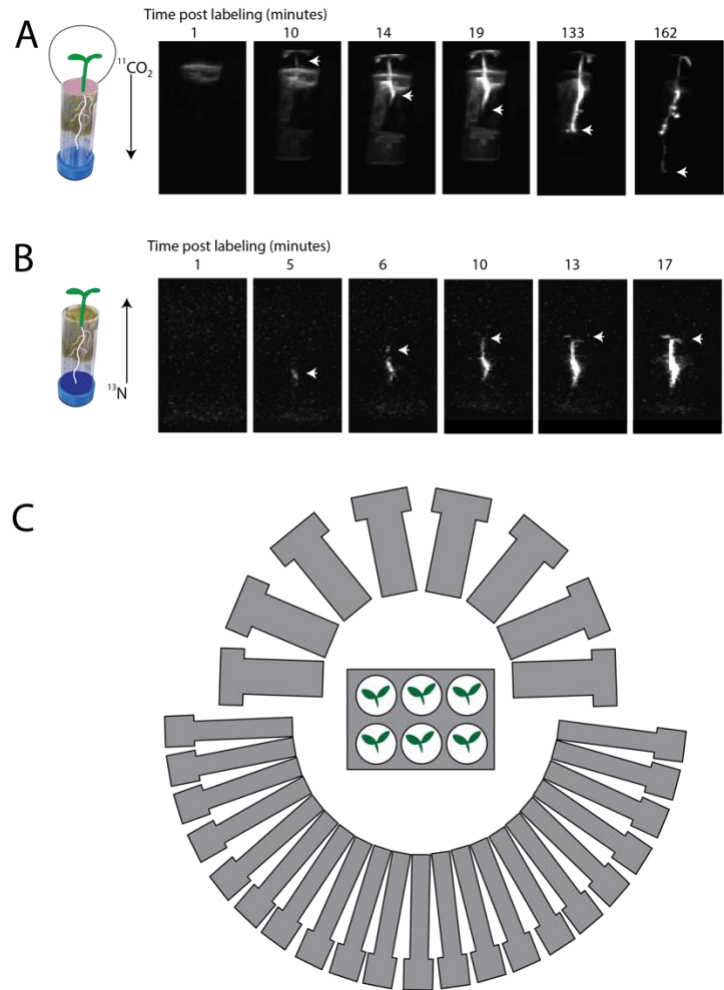

**Figure 1.** Dynamic PET imaging of phloem and xylem transport using  $^{11}\text{C}$  (A) and  $^{13}\text{N}$  (B), respectively. Radiolabeled  $^{11}\text{C}$  can be traced from young cotyledons where carbon is fixed into photosynthate, and transported through the phloem to the top of the root system within 14 minutes post-labeling (A). Distal root tips accumulate  $^{11}\text{C}$ -labeled photosynthate within less than 2.5 hours post-labeling. Xylem transport can be traced through the uptake and transport of  $^{13}\text{N}$  from seedling roots into cotyledons (B). Initial  $^{13}\text{N}$  uptake appears as a concentrated signal in the seedling roots within 5-minutes post-labeling, and moves acropetally into the cotyledons within 17 minutes post-labeling. The Plant PET imager is built inside of a Conviron growth chamber and consists of a large and a small half ring of 21 and 8 scintillation crystal detectors, respectively (23) (C). White arrows in (A & B) mark the moving front of radiolabeled  $^{11}\text{C}$  and  $^{13}\text{C}$  into the distal root and shoot systems, respectively. Dental impression media (yellow putty in A) was used to create an airtight seal above the graft junction region during  $^{11}\text{C}$  labeling. Real pictures of the plants shown in Supplemental Figure S1.

**Figure 2. Physiological timeline for xylem and phloem restoration during graft junction formation delineates a window for vascular maturation.**

Radiolabeled  $^{11}\text{C}$  fed to grafted scions in the form of  $^{11}\text{CO}_2$  is transported to rootstocks through the phloem by 5 days post-grafting (A). Radiolabeled  $^{13}\text{N}$  fed to grafted rootstocks accumulates at the graft site in healing junctions 3-5 days post-grafting, and initiates root-to-shoot xylem transport into the scion by 6 days post-grafting (B). Region of interest quantification of radioactive accumulation in grafted scions and rootstocks demonstrates that phloem transport is restored by 5 days post-grafting (C).  $^{11}\text{CO}_2$  data was collected 7200-14400 seconds after labeling and  $^{13}\text{N}$  data was collected 3600 -7200 seconds after labeling. Red dotted lines in (A) indicate the position of the graft junction, and the green and orange boxes in (C) indicate scion and rootstock ROIs, respectively.

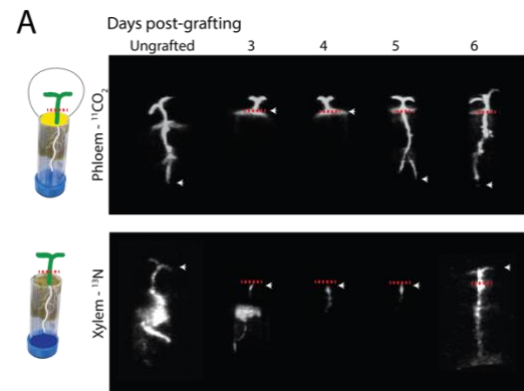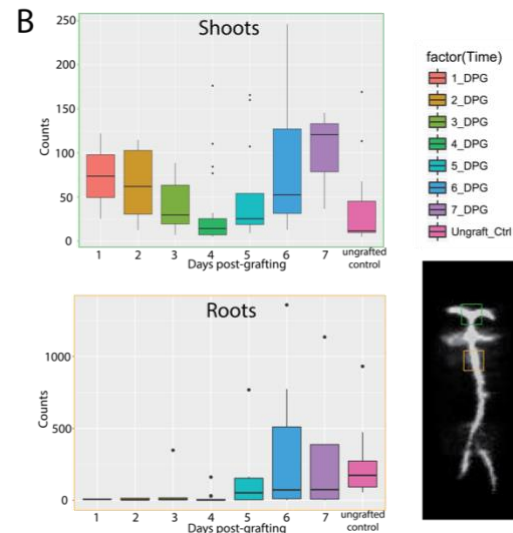

155 biologically informative failure to transport due to  
 156 severed vascular connectivity across the junction  
 157 (Figure 2). During the xylem transport experiments  
 158 we discovered that  $^{13}\text{N}$  uptake is highly responsive  
 159 to the water source that was used for our  
 160 hydroponic growth conditions. We were able to  
 161 remedy this issue by using distilled water with a  
 162 neutral pH. This technical hurdle limited the  
 163 replication of our xylem conductance  
 164 measurements; nonetheless, we were still able to  
 165 identify a time point for xylem restoration at 6 days  
 166 post-grafting (Figure 2A).

167 To supplement the reduced sampling for  $^{13}\text{N}$  xylem transport, we used a standard 5-(and-6)-  
 168 Carboxyfluorescein Diacetate (CFDA) dye transport assay (9, 19) to track the flow of xylem-  
 169 mobile fluorescent dye from severed roots into cotyledons. The CFDA transport assay aligned  
 170 closely, but not perfectly, with our PET imaging results, showing stabilized xylem transport at 5  
 171 days post-grafting (DPG) (Supplemental Figure S4). Thirty percent of the plants showed xylem  
 172 transport of CFDA as early as 4 DPG. To gain further insight into xylem formation at this early  
 173 time point, we examined the anatomical connectivity of the graft junction using confocal  
 174 microscopy and found that these grafts lacked mature vessel connections (Supplemental Figure  
 175 S4). Prior to 6 DPG, our PET data showed  $^{13}\text{N}$  radioactivity pooling within the junction region  
 176 (Figure 2). This can be attributed to positive xylem pressure that causes  $^{13}\text{N}$  containing xylem sap  
 177 to exude out of unhealed vessel elements and into the apoplast of the junction. Nitrogen requires  
 178 active transporters to re-enter the symplast, and thus becomes stuck at the graft site once  
 179 exuded. Unlike  $^{13}\text{N}$ , CFDA can diffuse back across the junction and re-enter the vascular  
 180 transport stream on the scion half of the graft. The small differences in temporal transport that we  
 181 observed between our PET and CFDA assays is likely due to physiological differences between  
 182  $^{13}\text{N}$  and CFDA transport dynamics.

183 To determine a temporal timeline for restored phloem function, we waited for the  $^{13}\text{N}$  radionuclide  
 184 to degrade over a period of more than 10 half-lives (> 100 minutes), and then labeled the same  
 185 plants with gaseous  $^{11}\text{CO}_2$ . We used airtight labeling chambers and dental impression putty that  
 186 blocked  $^{11}\text{CO}_2$  from being delivered below the graft junction (Figure 2; Supplemental Figure S1).  
 187 To measure restored phloem transport, we quantified the intensity of radioactivity within a region  
 188 of interest (ROI) above and below the graft junction (Figure 2B). In unhealed junctions from 1-4



189 DPG, we noticed that shoot-to-root phloem transport was abruptly halted at the site of the graft  
190 junction, and remained within the scion for the duration of our data collection ( $\geq 180$  minutes post-  
191 labeling) (Figure 2A). By 5 DPG, we observed restored phloem transport in 50% of the grafted  
192 seedlings (Figure 2B; Supplemental Figure S3). Subsequent healing from 6-7 DPG led to plants  
193 with increased radioactive accumulation within the rootstock, indicating increased transport  
194 capacity within the developing phloem (Figure 2B).

195 *Vascular maturation follows a 72-hour timeline from anatomical initiation to physiological*  
196 *restoration*

197 To examine anatomical restoration during graft formation, we stained and optically sectioned  
198 junctions from 3-9 DPG using laser scanning confocal microscopy (LSCM). As early as 3 DPG we  
199 observed initial signs of vascular differentiation in both well-formed (Figure 3A) and slightly off-  
200 center grafts (Figure 3B). At this stage of regeneration, we observed cells along the graft site with  
201 isodiametric callus-like morphology that also formed annular secondary cell wall thickenings that  
202 are indicative of protoxylem identity, thus forming an intermediate callus-protoxylem cell type  
203 (Figure 3A-C). In contrast, junctions with incomplete cellular contact across the graft site formed  
204 protruding callus cells with protoxylem-like secondary cell wall thickenings and air pockets within  
205 the internal cellular structure of the junction (Figure 3B-C). At the 4 DPG timepoint, we could  
206 distinguish immature protoxylem strands that connected across the junction (Figure 3E-G). These  
207 vascular strands often contained bulbous, callus-shaped vessel elements (prominently shown in  
208 Figure 3), bordered by tapered phloem tissue along the periphery of the developing junction  
209 (Figure 3H).

210 We could clearly identify stabilized vascular bridges curving through the junction by 5 DPG  
211 (Figure 3I-L). While the protoxylem bridges could easily be traced across the junction at this  
212 timepoint, we noticed that the vessel elements comprising these bridges presented a spectrum of  
213 cellular morphologies from bulbous to elongated shapes, corresponding with differing degrees of  
214 vascular maturation. This morphological spectrum aligned closely with the functional window that  
215 we observed for physiological xylem restoration in our PET and CFDA xylem transport  
216 experiments (Figure 2A; Supplemental Figure S4). We also observed off-centered grafts at 5  
217 DPG that showed substantial delays in vascular differentiation, anatomically resembling well-  
218 connected grafts at 3 DPG (Figure 3M). We suspect that this delayed vascular differentiation in  
219 off-centered grafts is caused by a prolonged callus proliferation phase, and that these micro-  
220 fluctuations in rootstock-scion alignment likely explain the temporal variation in physiological  
221 restoration that we observed with our PET imaging (Figure 2).

222 By 6 DPG, our PET data demonstrates that xylem and phloem transport is fully restored (Figure  
223 2). In association with this physiological milestone, we could distinguish mature protoxylem,  
224 metaxylem, and phloem strands connecting rootstocks and scions (Figure 3N-Q). From 7-9 DPG,  
225 we observed continued maturation of surrounding xylem tissues that weaved through the  
226 junction, disrupting the central pith (Figure 3R-T). Another pronounced anatomical feature that we  
227 saw at 1 week post-grafting was the presence of wide metaxylem strands that curved through the  
228 regenerated graft region marking the re-establishment of efficient root-to-shoot transport (Figure  
229 3N-Q). Overall, our anatomical imaging aligns closely with a model in which physiological  
230 transport does not resume until reprogrammed vascular tissue differentiates into mature,  
231 elongated cells that span the junction at 5-6 DPG (Figure 4).

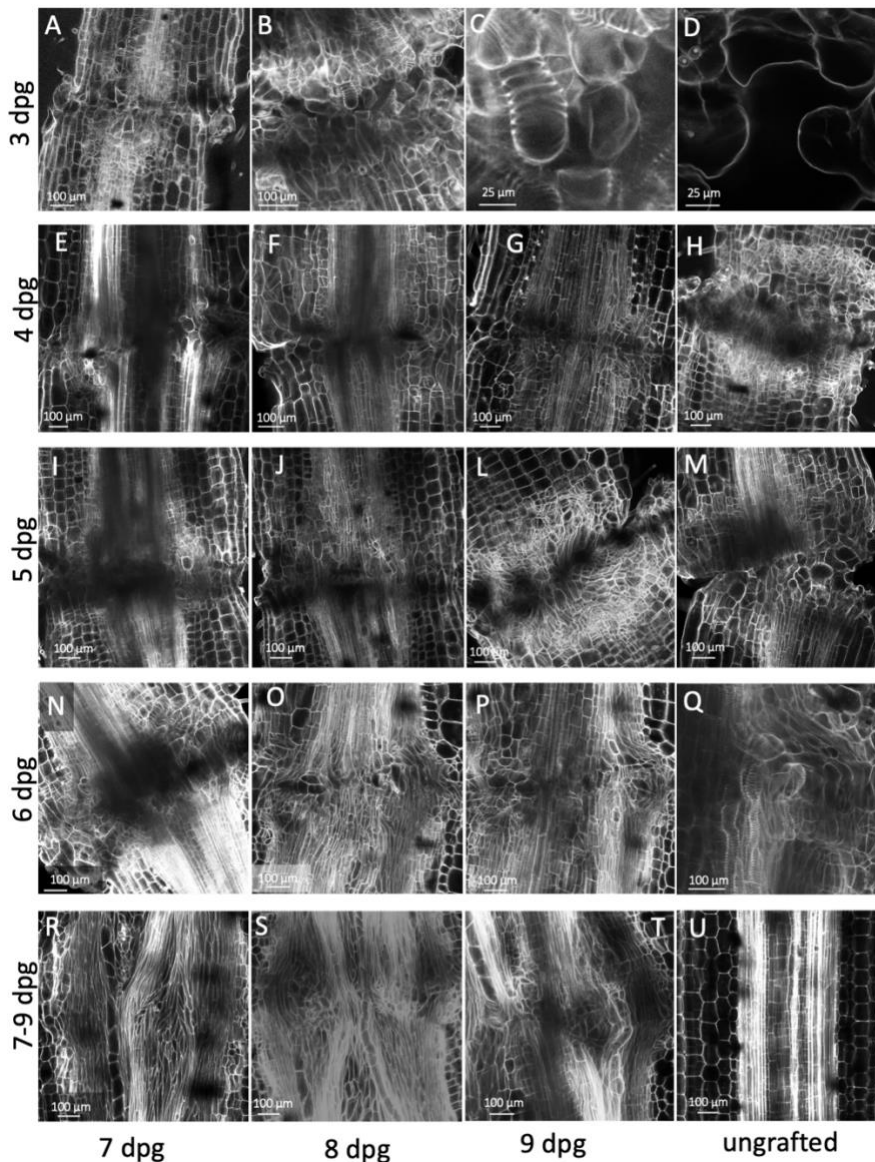

232

**Figure 3. Anatomical differentiation of the graft junction region from 3-9 days post-grafting defines a window for vascular differentiation and sources of developmental variability.** Optical sectioning using confocal microscopy of propidium iodide stained junctions was used to construct an anatomical timeline for junction formation from 3-9 days post-grafting. A well connected graft junction imaged at 3 days post-grafting (DPG) shows stabilized callus connections between the rootstock and scion with intermediate callus-protoxylem cells that have isodiametric morphology characteristic of calli and annular secondary cell wall thickenings that mark protoxylem identity (A). Grafts with poor rootstock scion contact at 3 DPG (B) form callus and hybrid callus-protoxylem cellular projections from both sides of the junction that fail to make contact across the graft (close up of B shown in C). Air spaces are visible within grafts that form poor cellular contact across the junction (D). Immature xylem strands can be traced across graft junctions by 4 DPG (E-H); however, most of these strands include bulbous protoxylem cells that have not matured into conducting tissue (indicated with arrowheads in E & G). Phloem strands can also be visualized connecting across the graft junction along the periphery of newly formed xylem strands (Labeled in a median section through the junction in E, and a tangential section through differentiating phloem in H). By 5 DPG well-aligned grafts have formed stabilized xylem and phloem connections across the junction (I-L) while grafts with poor rootstock-scion contact are anatomically delayed and developmentally resemble junctions at the 3 DPG stage (M). By 6 DPG, mature vessel elements and sieve tubes are connected across the junction, which coincides with restored xylem and phloem transport (N-P, and close up of connected xylem and phloem strands from P shown in Q). Extensive vascular differentiation from 7-9 DPG produces junctions that are packed with mature metaxylem, protoxylem, and phloem connections, and lack pith cells (R-T). In contrast, ungrafted hypocotyls have parallel vascular strands that surround a central pith (U).

7

## 233 Conclusion

234

235 We show that PET imaging can be used to sensitively track *in vivo* physiological function during  
236 graft regeneration. By pairing PET and LSCM technologies together, we are able to access  
237 fundamental questions regarding the relationship between anatomical maturation and restored  
238 transport. Our work identifies a 3 day developmental window between the first anatomical signs of  
239 vascular differentiation to restored physiological transport (Figure 4). Furthermore, we show that  
240 vascular transport does not resume until differentiating vasculature reaches maturity. Finally, we  
241 identify sources of heterogeneity during junction formation that not only impact developmental  
242 staging during molecular investigations into graft formation, but may also influence anatomical  
243 connectivity and ultimately the success of agricultural grafts.

Days post grafting

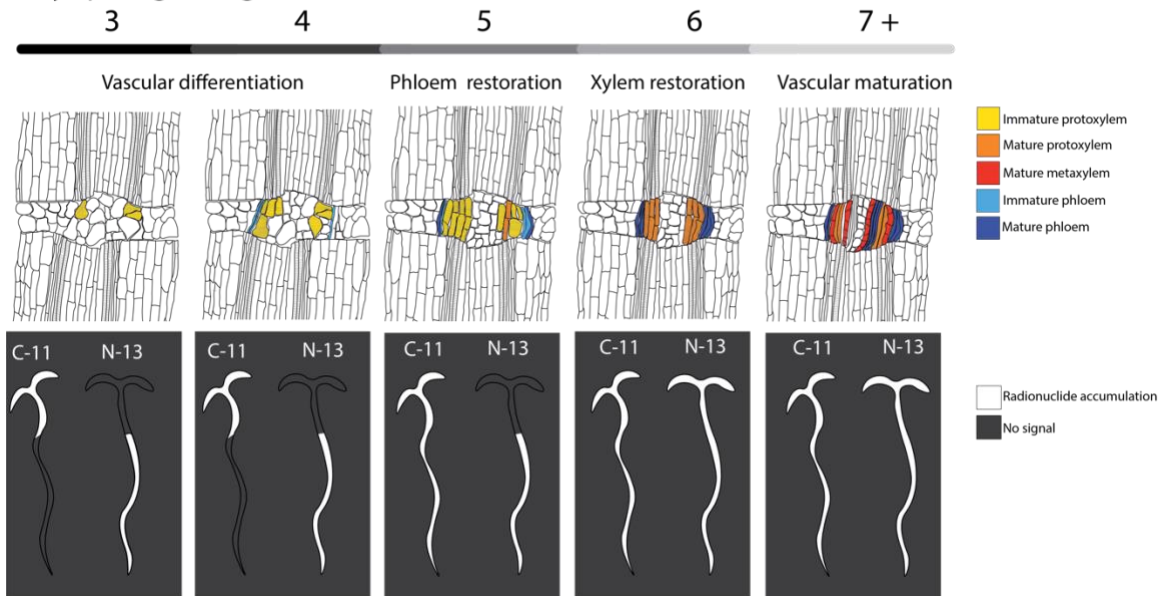

**Figure 4. A model for the anatomical and functional dynamics of graft junction formation informed by PET and confocal imaging.** Within 3 days post-grafting (DPG), early signs of *de novo* protoxylem specification are present. These premature protoxylem cells initiate with a callus-like morphology and subsequently differentiate into elongated vessel elements between 4-6 days post grafting, corresponding with restored root-to-shoot xylem transport. Phloem strands are visible by 4 DPG and subsequently show extensive connectivity between 5-6 DPG, corresponding with restored shoot-to-root phloem transport at 5 DPG.

245

246

## 247 Materials and Methods

248

### 249 Growth conditions and plant grafting

250 *Solanum lycopersicum* Cv. M82 seeds were treated with 50% Bleach for 30 seconds, rinsed  
251 thoroughly with deionized water (diH<sub>2</sub>O), and placed on damp paper towels to germinate in  
252 Phytatrays (Sigma-Aldrich, Saint Louis, MO, USA). Germination was synchronized by giving the  
253 seeds 3 days of dark treatment at room temperature, followed by three days in the growth  
254 chamber. The seedlings were then transferred into bottomless 50 mL Falcon tubes lined with  
255 rockwool (Grodan, Roermond, Netherlands), and grown at 23 °C, with a repeating 16:8 light:dark  
256 cycle in a hydroponic tub supplied with aeration rocks. Custom grafting clips that securely hold  
257 the rootstock and scion together at this early seedling stage were made by cutting a slit down the



258 side of Creatology Round Plastic Lacing (Michael's Craft Store, Irving, TX, USA). Scions between  
259 neighboring seedlings were reciprocally grafted onto one another using the tube grafting method  
260 on a staggered timescale starting 24 hours after plants were transferred into the hydroponic tub.  
261 Unsuccessful grafts were identified based on the appearance of drooping cotyledons within 48  
262 hours post-grafting and were removed from the study. Notably, some grafts died mid-study and  
263 were pulled from the dataset.

#### 264 *Delivery and PET imaging of $^{13}\text{N}$ and $^{11}\text{C}$ radionuclides*

265 *In vivo* functional xylem and phloem reconnections were investigated using PlantPET, a PET  
266 scanner with a vertical bore inside a plant growth chamber dedicated to functional plant imaging  
267 research (23) (Figure 1; Supplemental Figure S1). Functional xylem transport was assessed by  
268 feeding the rootstocks trace concentrations of aqueous radiolabeled  $^{13}\text{N}$  in the form of ammonium  
269 (Fig 2). The choice of aqueous  $^{13}\text{N}$ -labeled tracer over  $^{15}\text{O}$ -labeled water ( $\text{H}_2^{15}\text{O}$ ) to measure flow  
270 in the xylem was based on: (1) the relatively short half-life of  $^{15}\text{O}$  (2 minutes), which limits the  
271 amount of time available for imaging, resulting in noisy images; and (2) the fact that  $^{15}\text{O}$  emits  
272 high energy positrons that have a higher probability to escape the small tomato plants before  
273 positron annihilation, which increases the noise outside of the subject and reduces the usable  
274 events within the stem and leaf (Supplemental Figure S2). 1 mCi of  $[\text{}^{13}\text{N}]\text{NH}_4^+$  dissolved in water  
275 was delivered to the bottom of the 50 mL Falcon tube using a syringe (illustrated in Fig. 1B). The  
276 tubes were placed in a custom-built lead rack that holds six plants (Figure 1; Supplemental Figure  
277 S1) and cuts down background noise by shielding the scanner from radioactivity in the Falcon  
278 tubes. These plants were placed into the PlantPET imager where they were imaged for 10  
279 minutes to gauge radioactivity uptake. The radioactivity was flushed from the root system 30  
280 minutes after labeling and replaced with  $\text{dH}_2\text{O}$ , and then placed back in the PET imager for a  
281 continuous hour of imaging. Following  $>10$  half-lives of  $^{13}\text{N}$  decay ( $>100$  minutes), the plants were  
282 removed from the PET imager and prepped for  $^{11}\text{CO}_2$  delivery.

283 Functional phloem transport was assessed by feeding the leaves and shoots tracer  
284 concentrations of gaseous  $^{11}\text{CO}_2$  for photo-assimilation. In order to ensure that  $^{11}\text{C}$  was only fixed  
285 by portions of the plant that are above the graft junction, an airtight seal starting above the graft  
286 junction and extending to the edges of the Falcon tube was made out of Cinch dental impression  
287 media (Parkell, Brentwood, NY, USA) (Fig 2A). The plants were then encased in custom-made  
288 airtight labeling chambers, and fed 1 mCi of  $^{11}\text{CO}_2$ . Following labeling, the plants were placed in  
289 the PlantPET imager where they were imaged continuously for 2 hours starting at approximately  
290 20 minutes post radiolabeling.

#### 291 *PET image reconstruction, signal quantification, and decay time corrections*

292 Radioactive decays registered by the PlantPET scanner are stored as a continuous stream of list-  
293 mode events that can be divided into an arbitrary number of frames chosen by the user. We  
294 divided both sets of list-mode data (1-hour from  $^{13}\text{N}$  experiment and 2-hours from  $^{11}\text{C}$  experiment)  
295 into multiple subsets that are equivalent to a 60-second frame at the beginning of the imaging  
296 session. The actual frame duration was increased at later time points to account for radioactive  
297 decay ( $T_{1/2} = 9.97$  min for  $^{13}\text{N}$  and 20.38 min for  $^{11}\text{C}$ ). The same imaging protocol and frame  
298 definition was used for all xylem and phloem measurements (i.e., one for  $^{11}\text{C}$  and one for  $^{13}\text{N}$   
299 experiments).

300 List-mode events in each of the time frames were reconstructed using a graphic processing unit  
301 (GPU) based fast list-mode image reconstruction algorithm (see (23)). The result is a time series  
302 of 3D image volumes (256x256x160 voxels of 0.8x0.8x0.8 mm each) that represent the  
303 distribution of radioactivity concentration in the plants over time.

#### 304 *Rendering visual PET data and quantifying regions of interest (ROI) in FIJI*

305 Reconstructed files were rendered as 3-D movies using the import raw stack and 3-D reconstruct  
306 functions in FIJI (25). <sup>11</sup>C uptake and transport was quantified in FIJI using the ROI calculator  
307 function. A 7x7 pixel region of interest (ROI) was selected above and below the graft junction and  
308 average signal intensity across the 3-dimensional stack was quantified with the ROI calculator in  
309 FIJI ROI. Slices that dropped below an intensity value of two were considered to be products of  
310 “positron escape” and were removed from averaging. Transport was plotted as relative signal  
311 intensity above and below the graft junction. A similar calculation for <sup>13</sup>N was not performed due  
312 to the non-biological background signal produced by the escaped positrons that annihilated in the  
313 Rockwool.

#### 314 *Optical sectioning of the graft junction using laser scanning confocal microscopy*

315 Graft junctions were harvested from 3-8 days post-grafting and vacuum infiltrated with ice-cold  
316 FAA (4% formaldehyde, 5% glacial acetic acid, 50% ethanol, 35% milliQ H<sub>2</sub>O). Samples were  
317 fixed overnight at 4 °C, dehydrated through an ethanol series, rehydrated, stained for 1 hour in  
318 0.002% propidium iodide (Thermo Fisher, Waltham, MA, USA), dehydrated again, and cleared for  
319 at least 10 days in 100% methyl salicylate (Sigma-Aldrich, Saint Louis, MO, USA)(26). The  
320 stained and cleared junctions were imaged on a Leica SP8 laser scanning confocal microscope  
321 with a white light laser set to 514-nm wavelength, with the laser intensity ranging from 10%-80%  
322 depending on sample depth. Junctions were optically sectioned using the Z-stack function on the  
323 LasX Leica Software, with a step size ranging from 1-1.4 μm per slice. Raw confocal images  
324 were imported into FIJI (25) and exported as single-frame images and multi-frame videos.  
325 Anatomical progression of graft junction vascular differentiation was analyzed by tracking  
326 changes in cellular morphology, secondary cell wall features that are characteristic of protoxylem  
327 and metaxylem cell identity, and the spatial arrangement of newly differentiated vascular strands  
328 within the junction.

#### 329 *Xylem transport assays using CFDA dye*

330 Replicate trials of soil grown grafted plants from 3-7 days post-grafting were cut at their root tips  
331 and dipped into (5 mg/mL) of 5(-and-6)-Carboxyfluorescein Diacetate (CFDA) (Invitrogen®,  
332 Waltham, MA, USA). Plants were incubated under full-spectrum LED lights (Cirrus LED Grow  
333 Lights, Saco, ME, USA) for 60-90 minutes, and then scored for the presence or absence of CFDA  
334 in cotyledons using a Leica M205 dissection microscope (Leica Microsystems Inc., Buffalo Grove,  
335 IL, USA). Ungrafted seedlings were included as positive controls for each round of imaging.

336

#### 337 **Acknowledgments**

338

339 This work was supported by a grant to MHF from the MO/AR EPSCoR Plant Imaging Consortium  
340 (IIA-1430427/IIA-1430428), NSF REPS funding for AW (IOS-1942437). NYSTEM C029155 and  
341 NIH S10OD018516 awards to Cornell University’s Biological Resource Center to fund the u880  
342 laser scanning confocal microscope. CR was funded by a Cornell Presidential Life Sciences  
343 Fellowship, and NSF DBI-1040498 a Major Research Instrumentation grant for the development  
344 of the PlantPET scanner.

345

#### 346 **References**

347

- 348 1. M. Ikeuchi, Y. Ogawa, A. Iwase, K. Sugimoto, Plant regeneration: cellular origins and  
349 molecular mechanisms. *Development* **143**, 1442–1451 (2016).
- 350 2. K. Mudge, J. Janick, S. Scofield, E. E. Goldschmidt, A history of grafting (2009).

- 351 3. C. W. Melnyk, E. M. Meyerowitz, Plant grafting. *Curr. Biol.* **25**, R183–8 (2015).
- 352 4. B. Williams, M. U. Ahsan, M. H. Frank, Getting to the root of grafting-induced traits. *Curr.*  
353 *Opin. Plant Biol.* **59**, 101988 (2021).
- 354 5. E. J. Warschewsky, *et al.*, Rootstocks: Diversity, Domestication, and Impacts on Shoot  
355 Phenotypes. *Trends Plant Sci.* **21**, 418–437 (2016).
- 356 6. K. S. Powell, “A Holistic Approach to Future Management of Grapevine Phylloxera” in  
357 *Arthropod Management in Vineyards: Pests, Approaches, and Future Directions*, N. J.  
358 Bostanian, C. Vincent, R. Isaacs, Eds. (Springer Netherlands, 2012), pp. 219–251.
- 359 7. E. E. Goldschmidt, Plant grafting: new mechanisms, evolutionary implications. *Front. Plant*  
360 *Sci.* **5**, 727 (2014).
- 361 8. S. R. King, A. R. Davis, X. Zhang, K. Crosby, Genetics, breeding and selection of rootstocks  
362 for Solanaceae and Cucurbitaceae. *Sci. Hortic.* **127**, 106–111 (2010).
- 363 9. C. W. Melnyk, C. Schuster, O. Leyser, E. M. Meyerowitz, A Developmental Framework for  
364 Graft Formation and Vascular Reconnection in *Arabidopsis thaliana*. *Curr. Biol.* **25**, 1306–  
365 1318 (2015).
- 366 10. P. T. Serivichyaswat, *et al.*, High temperature perception in leaves promotes vascular  
367 regeneration and graft formation in distant tissues. *Development* **149** (2022).
- 368 11. M. A. Olmstead, N. Suzanne Lang, F. W. Ewers, S. A. Owens, Xylem Vessel Anatomy of  
369 Sweet Cherries Grafted onto Dwarfing and Nondwarfing Rootstocks. *J. Am. Soc. Hortic. Sci.*  
370 **131**, 577–585 (2006).
- 371 12. A. Rasool, *et al.*, Mechanisms Underlying Graft Union Formation and Rootstock Scion  
372 Interaction in Horticultural Plants. *Front. Plant Sci.* **11**, 590847 (2020).
- 373 13. A. Pina, P. Errea, A review of new advances in mechanism of graft compatibility–  
374 incompatibility. *Sci. Hortic.* **106**, 1–11 (2005).
- 375 14. M. Notaguchi, *et al.*, Cell-cell adhesion in plant grafting is facilitated by  $\beta$ -1,4-glucanases.  
376 *Science* **369**, 698–702 (2020).
- 377 15. A. Zhang, *et al.*, Cell-wall damage activates DOF transcription factors to promote wound  
378 healing and tissue regeneration in *Arabidopsis thaliana*. *Curr. Biol.* (2022)  
379 <https://doi.org/10.1016/j.cub.2022.02.069>.
- 380 16. M. Asahina, *et al.*, Spatially selective hormonal control of RAP2.6L and ANAC071  
381 transcription factors involved in tissue reunion in *Arabidopsis*. *Proc. Natl. Acad. Sci. U. S. A.*  
382 **108**, 16128–16132 (2011).
- 383 17. M. Ikeuchi, K. Sugimoto, A. Iwase, Plant callus: mechanisms of induction and repression.  
384 *Plant Cell* **25**, 3159–3173 (2013).
- 385 18. M. Knoblauch, *et al.*, Multispectral phloem-mobile probes: properties and applications. *Plant*  
386 *Physiol.* **167**, 1211–1220 (2015).
- 387 19. Q. Cui, L. Xie, C. Dong, L. Gao, Q. Shang, Stage-specific events in tomato graft formation  
388 and the regulatory effects of auxin and cytokinin. *Plant Sci.* **304**, 110803 (2021).

- 389 20. J. Xu, *et al.*, A method for simultaneously monitoring phloem and xylem reconnections in  
390 grafted watermelon seedlings. *Sci. Hortic.* **299**, 111058 (2022).
- 391 21. N. Turquois, M. Malone, Non-destructive assessment of developing hydraulic connections in  
392 the graft union of tomato. *J. Exp. Bot.* **47**, 701–707 (1996).
- 393 22. M. Hubeau, K. Steppe, Plant-PET Scans: In Vivo Mapping of Xylem and Phloem  
394 Functioning. *Trends Plant Sci.* **20**, 676–685 (2015).
- 395 23. Q. Wang, *et al.*, A dedicated high-resolution PET imager for plant sciences. *Phys. Med. Biol.*  
396 **59**, 5613–5629 (2014).
- 397 24. J. Mincke, J. Courtyn, C. Vanhove, S. Vandenberghe, K. Steppe, Guide to Plant-PET  
398 Imaging Using <sup>11</sup>CO<sub>2</sub>. *Front. Plant Sci.* **12**, 602550 (2021).
- 399 25. J. Schindelin, *et al.*, Fiji: an open-source platform for biological-image analysis. *Nat. Methods*  
400 **9**, 676–682 (2012).
- 401 26. H. Thomas, L. Van den Broeck, R. Spurney, R. Sozzani, M. Frank, Gene regulatory  
402 networks for compatible versus incompatible grafts identify a role for SIWOX4 during  
403 junction formation. *Plant Cell* (2021) <https://doi.org/10.1093/plcell/koab246>.

404  
405  
406  
407  
408  
409  
410  
411  
412  
413  
414  
415  
416  
417  
418  
419  
420  
421  
422  
423  
424  
425  
426  
427  
428  
429  
430  
431  
432  
433  
434  
435



436 **Supplemental Figures**

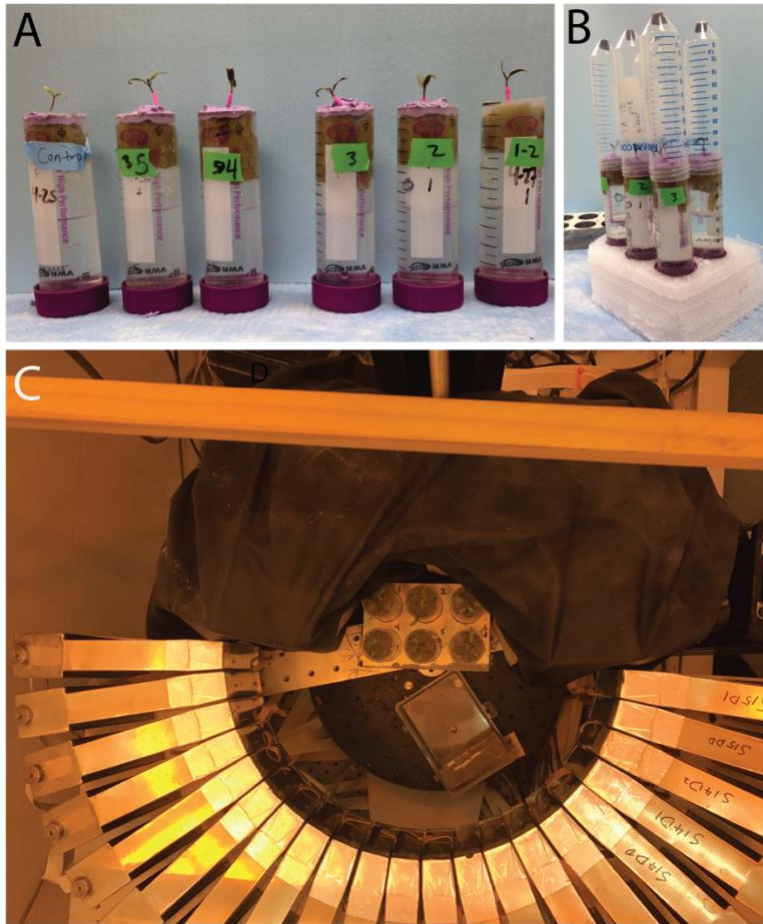

437

438 **Supplemental Figure S1. Plant labeling and imaging design.** Grafted and ungrafted control  
439 plants were grown in rockwool plugs within 50 mL tubes.  $^{13}\text{N}$  was delivered to root systems (A)  
440 and gaseous  $^{11}\text{CO}_2$  was delivered to an airtight chamber encasing seedling shoots (B). Prior to  
441 labeling, plant tissue below the graft junction was sealed off from the air using dental impression  
442 media (shown in A and B). Plants were placed in a lead rack and positioned in the middle of the  
443 PlantPET imager for data collection (C).

444

445

446

447

448

449

450

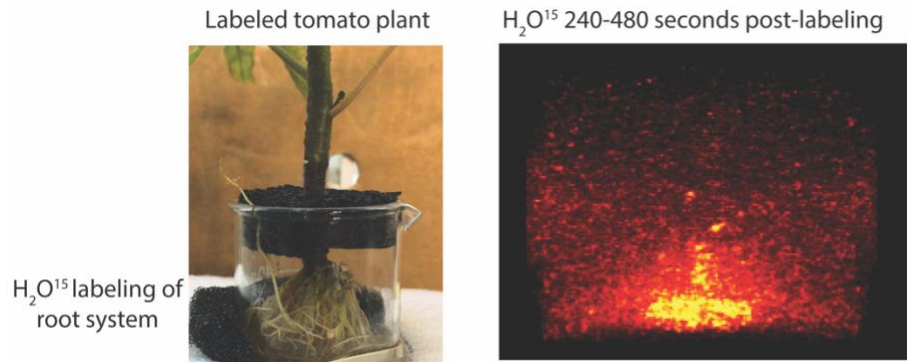

451

452 **Supplemental Figure 2. PET imaging of H<sub>2</sub>O<sup>15</sup> to test whether O-15 could be used as a**  
453 **radiotracer.** H<sub>2</sub>O<sup>15</sup> has a half-life of 120 seconds, producing noisy PET imaging. Initial tests to  
454 track xylem transport using radiolabeled water failed due to the very short half-life of O<sup>15</sup>, and the  
455 high-energy positrons that this radioisotope emits, producing noisy data with a high level of  
456 background due to positron escape.

457

458

459

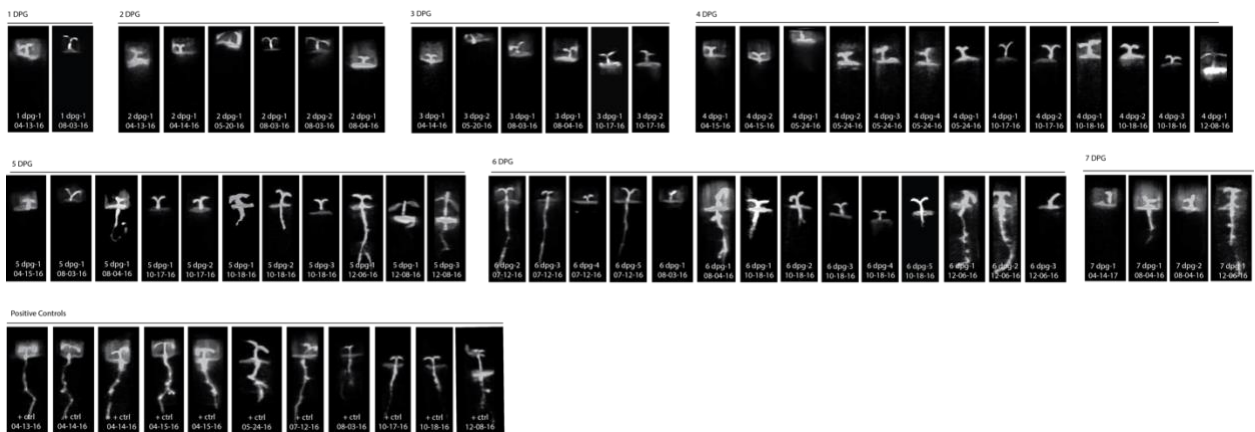

460

461

462 **Supplemental Figure 3. Complete images of <sup>11</sup>C phloem transport subjects shows restored**  
463 **transport at 5 days post-grafting.** Complete dataset of <sup>11</sup>CO<sub>2</sub> transport from 1-7 DPG, collected  
464 from 7200-14400 seconds post-labeling. Date and subject number are labeled at the bottom of  
465 each subject. Radiolabel accumulation corresponds with grayscale brightness in each image, with  
466 black indicating no radiolabel accumulation and white indicating the highest level of radioactive  
467 accumulation.

468

469

470

471

472

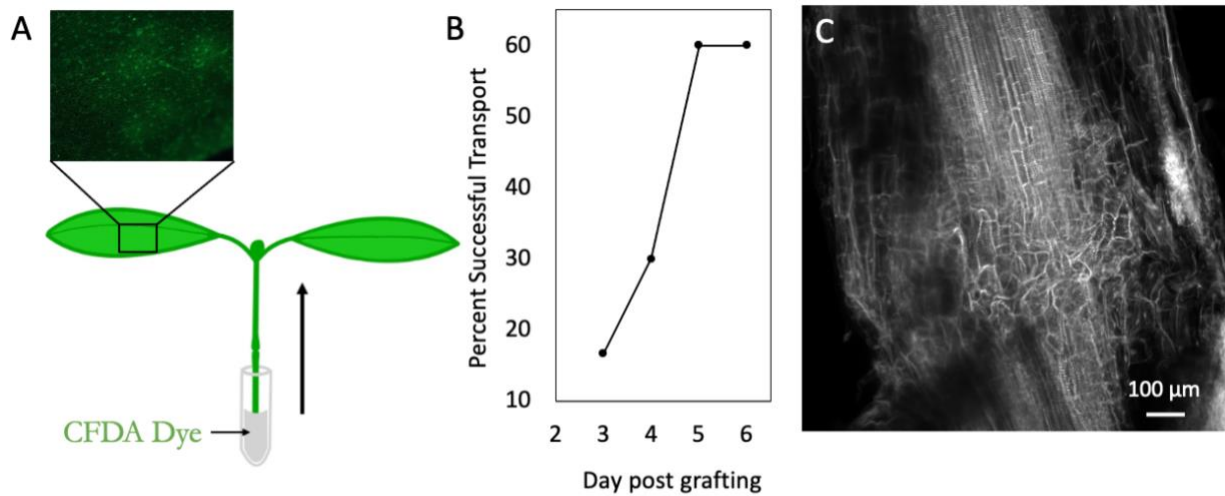

473  
474  
475  
476  
477  
478  
479  
480

**Supplemental Figure 4. CFDA Dye transport assay for xylem restoration.** Schematic for the 5(-and-6)-Carboxyfluorescein Diacetate (CFDA) transport assay to measure xylem transport in plants from 2-6 days post-grafting (A). 30% and 60% of grafts exhibited xylem transport by 4 and 5 days post-grafting, respectively (B). Max projection of confocal stack taken through graft junction at 4 days post-grafting shows that xylem files have not reconnected by this timepoint (C), indicating that low levels of dye transport can occur prior to xylem reconnection. Scale bar in C = 100  $\mu$ m.
